# Supplementary material for: Brown carbon absorptivity in fresh wildfire smoke: associations with volatility and chemical compound groups
Source: Royal Society of Chemistry journal article supplement (doi:10.1039/d3ea00067b), 2023-01-01
Supplement: d3ea00067b1.pdf [file d3ea00067b1.pdf]

## Supporting Information for

Brown Carbon Aerosols from Fresh Wildfire Smoke: Associations with Low-Volatility Organics and Chemical Compound Groups

To whom correspondence may be addressed: Nishit Shetty Email: nishit.shetty@wustl.edu; Rajan Chakrabarty Email: chakrabarty@wustl.edu

### S1 TOA-based Volatility distribution estimation

The organic carbon (OC) volatility distribution was estimated using a temperature profile based on the NIOSH870 protocol<sup>1</sup>. In this protocol, a filter punch is placed within the instrument and the temperature is systematically increased to obtain different OC bins. Heating is performed in helium where each sample is first heated to 310°C; OC emitted at this temperature is categorized as OC1. Subsequently, the temperature is ramped up to 475°C, 615°C, and 870°C, to obtain OC2, OC3, and OC4, respectively. A correction is performed to account for any OC charring that might have occurred during the heating process. Once the OC has been quantified, oxygen is added along with helium to the system to yield the elemental carbon (EC) remaining on the filter.

The maximum saturation vapor pressure of the organics emitted during each temperature ramp was estimated using the Clausius-Clapeyron equation as shown below:

$$P_{sat} = P_{atm} \cdot \exp\left(-\frac{\Delta H_{vap}}{R} \left(\frac{1}{T_{amb}} - \frac{1}{T_{peak}}\right)\right) \quad [S1]$$

Where  $P_{sat}$  is the saturation vapor pressure at an ambient temperature ( $T_{amb}$ ) of 300 K,  $P_{atm}$  is atmospheric pressure,  $R$  is the gas constant (8.314 J/mol/K),  $T_{peak}$  is the temperature at which a given OC peak is obtained, and  $\Delta H_{vap}$  is the heat of vaporization calculated according to Donahue et al.<sup>2</sup>, such that the  $\Delta H_{vap}$  value is 100 kJ/mol for a saturation concentration of 1  $\mu\text{g}/\text{m}^3$  and a subsequent factor of 10 spacing in saturation concentration results in a change of 5.8 kJ/mol. The  $P_{sat}$  value is converted to a saturation concentration ( $C^*$ ) based on the ideal gas law:

$$C^* = \frac{P_{sat} MW}{RT_{amb}} \quad [S2]$$

MW is the molecular weight of the compounds, estimated based on the distribution provided in Grieshop et al.<sup>3</sup>. The equations are iteratively solved to obtain the  $C^*$  value for a given value of  $T_{peak}$ . Based on these calculations, we estimated that the temperatures corresponding to the four OC peaks would result in OC emissions with maximum  $C^*$  values of 1.8E3, 0.38, 3E-4, and 6E-10  $\mu\text{g}/\text{m}^3$  for OC1, OC2, OC3, and OC4, respectively. These values resulted in our classification of OC1 as SVOC, OC2 and OC3 as LVOC, and OC4 as ELVOC based on the volatility distribution set provided by Donahue et al.<sup>4</sup>. These calculations do not provide exact measurements of the volatilities of the organics, but they give reliable estimates of the class of organics released during each temperature phase of the thermal-optical analysis. Ma et al.<sup>5</sup> correlated the OC peaks obtained using the IMPROVE\_A protocol with organic volatility and found good agreement between the two

quantities, supporting the use of such calculations to estimate OC volatility from offline measurements.

### **S2 ToF-MS based volatility**

Li et al.<sup>6</sup> have provided parametrizations to estimate the saturation mass concentration ( $C_0$ ) for a given compound based on its elemental composition. The equation used to determine  $C_0$  is:

$$\log_{10}C_0 = (n_C^0 - n_C)b_C - n_O b_O - 2 \cdot \frac{n_C n_O}{n_C + n_O} b_{CO} - n_N b_N - n_S b_S \quad [S3]$$

Where  $n_C^0$  is the reference carbon number,  $n_C$ ,  $n_O$ ,  $n_N$ , and  $n_S$  denote the numbers of carbon, oxygen, nitrogen, and sulfur atoms, respectively. The values for  $n_C^0$  and the  $b$  coefficients are provided in Table S3. The  $C_0$  values obtained for the different compounds was subsequently classified as IVOC, SVOC, LVOC, or ELVOC based on the volatility distributions set by Donahue et al.<sup>4</sup>.

### **S3 Johnson-Neyman Analysis**

The Johnson-Neyman analysis technique is used to explore the moderating effect of a continuous variable on the relationship between a predictor and response variable. The technique provides a range for the moderating variable over which the effect of the predictor variable on the response variable is statistically significant. We used a workbook developed by Carden et al.<sup>7</sup> to perform the Johnson-Neyman analysis. The EC and EL/LVOC concentrations were input as the predictor and moderating variables, respectively. The water-insoluble BrC  $Ab_{S405}$  values were input as the response variable. A p-value of 0.01 was used to set the statistical significance of the results. The worksheet outputs the range for the moderating variable over which the effect of the change in the EC concentrations is significant on the WI BrC  $Ab_{S405}$  values. The upper limit of this range was above the total EL/LVOC concentrations measured in our study, so only the lower bound was reported in this study. The values from the analysis are only indicative of the results observed in our study and might not be applicable to other combustion systems. Regardless, the Johnson-Neyman analysis provides a decent estimate for the significance of the moderating variable on observed relationships between two different parameters.

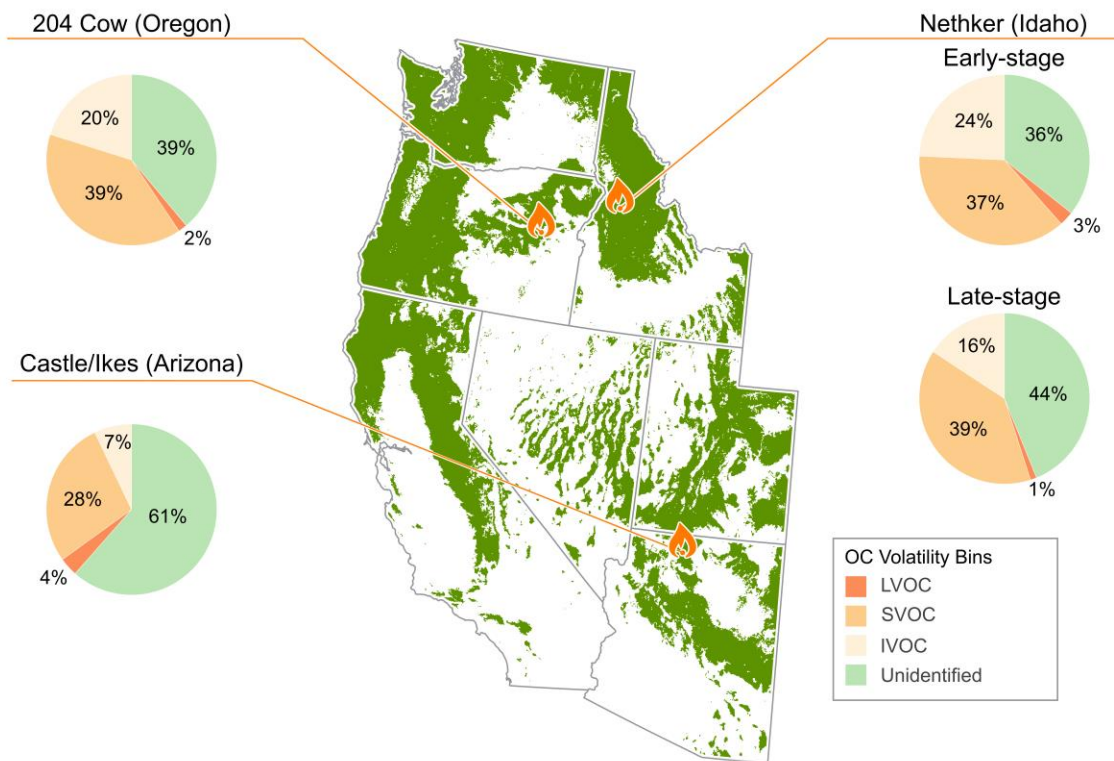

**Figure S1:** OC volatility distributions estimated from the ToF-MS data for carbonaceous aerosols sampled across three wildfire locations in Idaho, Oregon, and Arizona. The results are similar to those presented in Figure 1 with SVOC and IVOC compounds placed in separate bins.

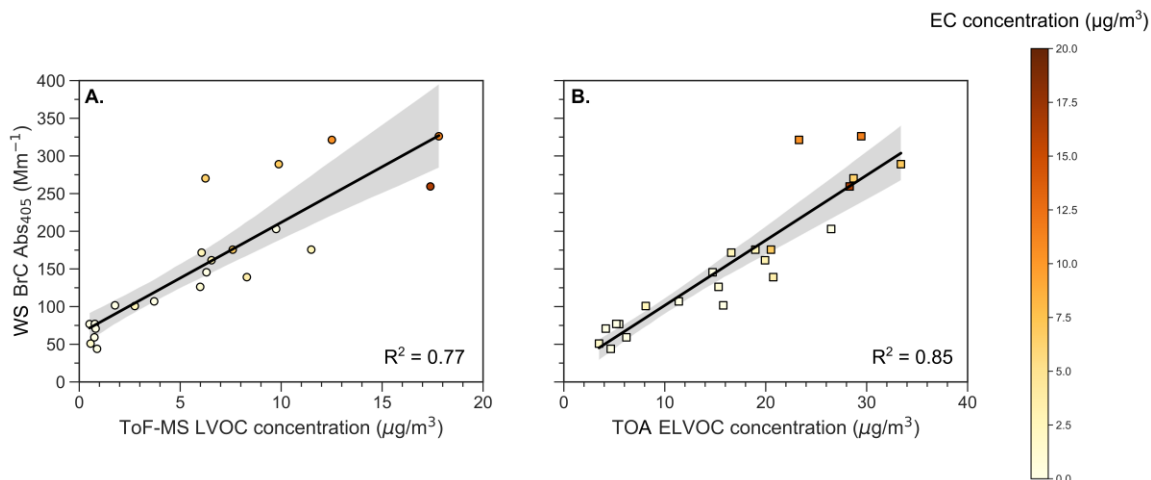

**Figure S2:** *Dependence of WS BrC Abs<sub>405</sub> on A.) LVOC and B.) ELVOC concentrations determined using HR ToF-MS and TOA data, respectively. The solid black lines represent linear fits to the data with the shaded region representing 95% confidence intervals. The color bar depicts the EC concentration for each sample obtained from TOA.*

We observed a positive association between WS BrC and EL/LVOC concentrations. Samples with higher EC concentrations had slightly lower light absorption coefficients which indicates that the compounds co-emitted with greater EC concentrations might have low water-solubility.

**Table S1.** Information on the date and time of sampling for the different fires. It was hard to distinguish emissions from the Castle and Ikes fires, consequently, the samples from those fires are termed as Arizona fires here.

| <b>Filter #</b>  | <b>Date</b> | <b>Sample Time Start<br/>(local time)</b> | <b>Sample Time Stop<br/>(local time)</b> | <b>Fire</b>         |
|------------------|-------------|-------------------------------------------|------------------------------------------|---------------------|
| 1                | 8/9/2019    | 12:49                                     | 13:45                                    | Nethker Fire        |
| 2                | 8/9/2019    | 13:58                                     | 14:58                                    | Nethker Fire        |
| 3 (field blank)  | 8/9/2019    | 15:13                                     | 15:23                                    | Nethker Fire        |
| 4                | 8/9/2019    | 16:54                                     | 17:54                                    | Activity Barn       |
| 5                | 8/10/2019   | 21:34                                     | 22:34                                    | Nethker Fire        |
| 6                | 8/11/2019   | 1:01                                      | 2:01                                     | Nethker Fire        |
| 7                | 8/11/2019   | 4:29                                      | 5:29                                     | Nethker Fire        |
| 8                | 8/11/2019   | 5:45                                      | 6:45                                     | Nethker Fire        |
| 9                | 8/11/2019   | 7:35                                      | 8:35                                     | Nethker Fire        |
| 10               | 8/11/2019   | 9:21                                      | 10:29                                    | Nethker Fire        |
| 11               | 8/12/2019   | 12:51                                     | 13:51                                    | Nethker Fire        |
| 12               | 8/12/2019   | 14:22                                     | 15:22                                    | Nethker Fire        |
| 13               | 8/13/2019   | 21:39                                     | 22:39                                    | Nethker Fire        |
| 14               | 8/13/2019   | 23:29                                     | 0:29                                     | Nethker Fire        |
| 15               | 8/14/2019   | 1:38                                      | 2:38                                     | Nethker Fire        |
| 16 (background)  | 8/15/2019   | 14:37                                     | 15:39                                    | Nethker Fire        |
| 17 (background)  | 8/15/2019   | 19:56                                     | 20:54                                    | Nethker Fire        |
| 18               | 8/15/2019   | 17:23                                     | 18:23                                    | Nethker Fire        |
| 19               | 8/17/2019   | 0:07                                      | 1:07                                     | Nethker Fire        |
| 20 (field blank) | 8/17/2019   | 0:17                                      | 0:24                                     | Nethker Fire        |
| 21               | 8/17/2019   | 1:29                                      | 2:29                                     | Nethker Fire        |
| 22               | 8/20/2019   | 0:47                                      | 1:51                                     | Arizona Castle Fire |
| 23               | 8/20/2019   | 2:40                                      | 3:41                                     | Arizona Ikes Fire   |
| 24               | 8/21/2019   | 0:14                                      | 1:14                                     | Arizona Ikes Fire   |
| 25 (background)  | 8/21/2019   | 4:06                                      | 5:06                                     | Arizona             |
| 26 (background)  | 8/21/2019   | 21:24                                     | 22:27                                    | Arizona             |
| 27               | 8/22/2019   | 1:03                                      | 2:03                                     | Arizona             |
| 28               | 8/22/2019   | 3:34                                      | 4:34                                     | Arizona             |
| 29 (background)  | 8/25/2019   | 17:21                                     | 17:52                                    | Oregon Cow Fire     |
| 30 (background)  | 8/25/2019   | 18:10                                     | 19:15                                    | Oregon Cow Fire     |
| 31               | 8/25/2019   | 20:08                                     | 21:12                                    | Oregon Cow Fire     |
| 32               | 8/26/2019   | 2:53                                      | 3:53                                     | Oregon Cow Fire     |
| 33               | 8/26/2019   | 5:40                                      | 6:40                                     | Oregon Cow Fire     |

**Table S2.** Compounds tentatively identified during chemical analysis along with the group they were classified in.

| <b>Compound Number</b> | <b>Compound Name</b>                  | <b>MW (w/o TMS)</b> | <b>Formula (w TMS)</b> | <b>Compound classification</b> |
|------------------------|---------------------------------------|---------------------|------------------------|--------------------------------|
| 1                      | Levoglucofan                          | 162                 | C15H34O5Si3            | Sugar                          |
| 2                      | Dehydroabietic acid                   | 300                 | C23H36O2Si             | Terpenoid                      |
| 3                      | Isopimaric acid                       | 302                 | C23H38O2Si             | Terpenoid                      |
| 4                      | Didehydroabietic acid                 | 298                 | C22H30O3Si             | Terpenoid                      |
| 5                      | UNK-4109                              | -                   | -                      | Sugar                          |
| 6                      | Hexadecanoic acid                     | 256                 | C19H40O2Si             | Acid                           |
| 7                      | Retene                                | 234                 | C18H18                 | PAH                            |
| 8                      | vanillic acid                         | 168                 | C14H24O4Si2            | Aromatic                       |
| 9                      | UNK-3427                              | -                   | -                      | Sugar                          |
| 10                     | Methyl dehydroabietate                | 314                 | C21H30O2               | Terpenoid                      |
| 11                     | Pimaric acid                          | 302                 | C23H38O2Si             | Terpenoid                      |
| 12                     | Docosanoic acid                       | 340                 | C25H52O2Si             | Acid                           |
| 13                     | 7-Oxodehydroabietic acid              | 314                 | C23H34O3Si             | Terpenoid                      |
| 14                     | Palustric Acid                        | 302                 | C23H38O2Si             | Terpenoid                      |
| 15                     | UNK-3423                              | -                   | -                      | Sugar                          |
| 16                     | Eicosanoic acid                       | 312                 | C23H48O2Si             | Acid                           |
| 17                     | Isopimaral                            | 286                 | C20H30O                | Terpenoid                      |
| 18                     | Kaur-16-en-18-ol, (4-alpha)-          | 272                 | C23H40OSi              | Terpenoid                      |
| 19                     | Tetradecanoic acid                    | 228                 | C17H36O2Si             | Acid                           |
| 20                     | 3-Vanilpropanol                       | 182                 | C16H30O3Si2            | Aromatic                       |
| 21                     | 7-Oxodehydroabietic acid Methyl ester | 328                 | C21H28O3               | Aromatic                       |
| 22                     | Q2-499                                | 286                 | C20H30O                | Terpenoid                      |
| 23                     | UNK-3959                              | 266                 | C20H26                 | PAH                            |
| 24                     | 8-Isopropyl-1,3-dimethylphenanthrene  | 248                 | C19H20                 | PAH                            |
| 25                     | Tetracosanoic acid                    | 368                 | C27H56O2Si             | Acid                           |
| 26                     | Q2-47                                 | -                   | -                      | Sugar                          |
| 27                     | UNK-4117                              | -                   | -                      | Sugar                          |
| 28                     | UNK-4100                              | 298                 | C22H30O3Si             | Terpenoid                      |
| 29                     | UNK-4083                              | 254                 | C19H38O2Si             | Acid                           |
| 30                     | UNK-AHG-HZ-SOAZ-157                   | 162                 | C15H34O5Si3            | Sugar                          |
| 31                     | Dehydroabietal                        | 284                 | C20H28O                | Terpenoid                      |
| 32                     | Phenanthrene, 2,3,5-trimethyl-        | 220                 | C17H16                 | PAH                            |
| 33                     | UNK-4115                              | -                   | -                      | Sugar                          |
| 34                     | Octadecanoic acid                     | 284                 | C21H44O2Si             | Acid                           |
| 35                     | Sandaracopimarinal                    | 286                 | C20H30O                | Terpenoid                      |
| 36                     | UNK-1464                              | 284                 | C20H28O                | Terpenoid                      |
| 37                     | UNK-3425                              | -                   | -                      | Sugar                          |
| 38                     | UNK-4128                              | -                   | -                      | Sugar                          |

|    |                                                                  |     |              |                 |
|----|------------------------------------------------------------------|-----|--------------|-----------------|
| 39 | UNK-4126                                                         | -   | -            | Sugar           |
| 40 | Q2-287                                                           | -   | -            | Sugar           |
| 41 | Deoxy-ribo-hexonic acid 1-4-lactone                              | 162 | C15H34O5Si3  | Oxygenated      |
| 42 | Sandaracopimaric acid                                            | 302 | C23H38O2Si   | Terpenoid       |
| 43 | Heptadecanoic acid isomer                                        | 270 | C20H42O2Si   | Acid            |
| 44 | 10,18-Bisnorabieta-5,7,9(10),11,13-pentaene                      | 238 | C18H22       | PAH             |
| 45 | Phenanthrene, 1,7-dimethyl-                                      | 206 | C16H14       | PAH             |
| 46 | Mannosan                                                         | 162 | C15H34O5Si3  | Sugar           |
| 47 | UNK-3730                                                         | 296 | C20H24O2     | Terpenoid       |
| 48 | Abietic acid                                                     | 302 | C23H38O2Si   | Terpenoid       |
| 49 | UNK-4033                                                         | -   | -            | Unknown         |
| 50 | Coniferyl aldehyde                                               | 178 | C13H18O3Si   | Aromatic        |
| 51 | Q2-608                                                           | -   | -            | Unknown         |
| 52 | UNK-4108                                                         | -   | -            | Sugar           |
| 53 | UNK-3871                                                         | 270 | C20H30       | Terpenoid       |
| 54 | Levopimaric acid                                                 | 302 | C23H38O2Si   | Terpenoid       |
| 55 | UNK-3885                                                         | -   | -            | Terpenoid       |
| 56 | UNK-4047                                                         | 232 | C18H16       | PAH             |
| 57 | Isopimaric acid isomer                                           | 302 | C23H38O2Si   | Terpenoid       |
| 58 | 1-(10-Methylanthracen-9-yl)ethanone                              | 234 | C17H14O      | PAH             |
| 59 | 4-nitrocatechol                                                  | 155 | C12H21O4Si2N | Nitrogen        |
| 60 | 1-Hexacosanol                                                    | 382 | C29H62OSi    | Alcohol         |
| 61 | Hexacosanoic acid                                                | 396 | C29H60O2Si   | Acid            |
| 62 | UNK-4080                                                         | -   | -            | Triterpenoid    |
| 63 | Azelaic acid                                                     | 188 | C15H32O4Si2  | Oxygenated      |
| 64 | Docosanol                                                        | 326 | C25H54OSi    | Alcohol         |
| 65 | Divanillyl                                                       | 274 | C22H34O4Si2  | Aromatic        |
| 66 | Dehydroabietinol                                                 | 286 | C23H38OSi    | Terpenoid       |
| 67 | 6,4'-Dimethoxy-7-hydroxyisoflavone                               | 298 | C20H22O5Si   | Terpenoid       |
| 68 | Q2-479                                                           | -   | -            | Sugar           |
| 69 | UNK-3976                                                         | -   | -            | Unknown         |
| 70 | UNK-4119                                                         | -   | -            | Sugar           |
| 71 | 4,4-(Tetrahydrofuran-3,4-diyl)dimethanediyl)bis(2-methoxyphenol) | 344 | C26H40O5Si2  | Aromatic        |
| 72 | UNK-4089                                                         | 288 | C23H40OSi    | Terpenoid       |
| 73 | UNK-3669                                                         | -   | -            | Unknown         |
| 74 | UNK-3708                                                         | -   | -            | Unknown         |
| 75 | 9-Tetradecenoic acid                                             | 226 | C17H34O2Si   | Acid            |
| 76 | Juvibione                                                        | 266 | C16H26O3     | Sesquiterpenoid |
| 77 | UNK-3942                                                         | -   | -            | Unknown         |
| 78 | UNK-4075                                                         | -   | -            | Sugar           |

|     |                                         |     |             |                   |
|-----|-----------------------------------------|-----|-------------|-------------------|
| 79  | Hydroquinone                            | 110 | C12H22O2Si2 | Aromatic          |
| 80  | 5-(hydroxymethyl)furfural               | 126 | C9H14O3Si   | Aromatic          |
| 81  | Butanedioic acid                        | 118 | C10H22O4Si2 | Oxygenated        |
| 82  | UNK-2323                                | -   | -           | Sugar             |
| 83  | UNK_3858                                | -   | -           | Oxygenated        |
| 84  | Vanillin                                | 152 | C11H16O3Si  | Aromatic          |
| 85  | Q2-517                                  | 218 | C17H26O2Si  | Aromatic          |
| 86  | Q2-558                                  | -   | -           | Sugar             |
| 87  | Pyrogallol                              | 126 | C15H30O3Si3 | Aromatic          |
| 88  | 3-Hydroxybenzoic acid                   | 138 | C13H22O3Si2 | Aromatic          |
| 89  | 4-Hydroxybenzoic acid                   | 138 | C13H22O3Si2 | Aromatic          |
| 90  | 3,4-Dihydroxybenzaldehyde               | 138 | C13H22O3Si2 | Aromatic          |
| 91  | Acetovanillone                          | 166 | C12H18O3Si  | Aromatic          |
| 92  | 1,2,4-Benzenetriol                      | 126 | C15H30O3Si3 | Aromatic          |
| 93  | Galactosan                              | 162 | C15H34O5Si3 | Sugar             |
| 94  | UNK-3841                                | -   | -           | Sugar             |
| 95  | 3-(Methylthio)benzoic acid              | 168 | C11H16O2SiS | Sulfur-containing |
| 96  | Methyl vanillate                        | 182 | C12H18O4Si  | Aromatic          |
| 97  | UNK-4105                                | 180 | C14H24O2Si  | Aromatic          |
| 98  | UNK-4094                                | -   | -           | Sugar             |
| 99  | Q2-494                                  | -   | -           | Sugar             |
| 100 | UNK-4039                                | -   | -           | Sugar             |
| 101 | Dodecanoic acid                         | 200 | C15H32O2Si  | Acid              |
| 102 | Q2-546                                  | -   | -           | Sugar             |
| 103 | Q2-560                                  | -   | -           | Sugar             |
| 104 | UNK-3784                                | -   | -           | Sugar             |
| 105 | UNK-3940                                | -   | -           | Sugar             |
| 106 | Q2-537                                  | -   | -           | Sugar             |
| 107 | Q2-593                                  | -   | -           | Sugar             |
| 108 | 2, 4-Dihydroxyacetophenone              | 152 | C14H24O3Si2 | Aromatic          |
| 109 | Suberic acid                            | 174 | C14H30O4Si2 | Oxygenated        |
| 110 | UNK-3176                                | 162 | C15H34O5Si3 | Oxygenated        |
| 111 | UNK-4054                                | 164 | C15H36O5Si3 | Sugar             |
| 112 | Adonitol                                | 152 | C20H52O5Si5 | Sugar             |
| 113 | (2R,3R,4R,5S)-Hexane-1,2,3,4,5,6-hexaol | 182 | C18H46O6Si4 | Sugar             |
| 114 | UNK-3931                                | -   | -           | Unknown           |
| 115 | UNK-4081                                | -   | -           | Sugar             |
| 116 | Veratric acid                           | 182 | C12H18O4Si  | Aromatic          |
| 117 | UNK-4002                                | 194 | C14H22O3Si  | Aromatic          |
| 118 | UNK-3440                                | -   | -           | Sugar             |
| 119 | Methyl 3,4-dihydroxybenzoate            | 168 | C14H24O4Si2 | Aromatic          |
| 120 | UNK-3860                                | -   | -           | Sugar             |



|     |                                                                                             |     |              |            |
|-----|---------------------------------------------------------------------------------------------|-----|--------------|------------|
| 121 | UNK-4113                                                                                    | -   | -            | Sugar      |
| 122 | Hexonic acid, 3-deoxy-,<br>gamma-lactone, 2,5,6-tris-<br>OH                                 | 162 | C15H34O5Si3  | Oxygenated |
| 123 | 4-methyl-5-nitrocatechol                                                                    | 169 | C13H23O4Si2N | Nitrogen   |
| 124 | 3-methyl-5-nitrocatechol                                                                    | 169 | C13H23O4Si2N | Nitrogen   |
| 125 | Homovanillic Acid                                                                           | 182 | C13H23O4SiN  | Aromatic   |
| 126 | Isophthalic acid                                                                            | -   | -            | Aromatic   |
| 127 | Tridecanoic acid                                                                            | 214 | C16H34O2Si   | Acid       |
| 128 | 3,4-Dihydroxybenzoic acid                                                                   | 154 | C16H30O4Si3  | Aromatic   |
| 129 | UNK-3471                                                                                    | 240 | C18H32O5Si2  | Aromatic   |
| 130 | UNK-4098                                                                                    | 261 | C18H27O3SiN  | Nitrogen   |
| 131 | UNK-3929                                                                                    | 243 | C20H29O3Si2N | Nitrogen   |
| 132 | Pentadecanoic acid isomer 1                                                                 | 242 | C18H38O2Si   | Acid       |
| 133 | Pentadecanoic acid isomer 2                                                                 | 242 | C18H38O2Si   | Acid       |
| 134 | Coniferyl alcohol                                                                           | 180 | C16H28O3Si2  | Aromatic   |
| 135 | Q2-572                                                                                      | 254 | C16H30O2     | Acid       |
| 136 | Pentadecanoic acid                                                                          | 242 | C18H38O2Si   | Acid       |
| 137 | Vanillyl glycol                                                                             | 198 | C19H38O4Si3  | Aromatic   |
| 138 | UNK-446                                                                                     | 266 | C19H22O      | Aromatic   |
| 139 | 1-Hexadecanol                                                                               | 242 | C19H42OSi    | Alcohol    |
| 140 | 4b,8-Dimethyl-2-<br>isopropylphenanthrene,<br>4b,5,6,7,8,8a,9,10-<br>octahydro-<br>UNK-4020 | 256 | C19H28       | Terpenoid  |
| 141 | UNK-4048                                                                                    | -   | -            | Sugar      |
| 142 | UNK-4048                                                                                    | -   | -            | Unknown    |
| 143 | C16 acid isomer 1                                                                           | 256 | C19H40O2Si   | Acid       |
| 144 | UNK-4107                                                                                    | 256 | C19H28       | Terpenoid  |
| 145 | UNK-4045                                                                                    | 260 | C21H32O4Si2  | Aromatic   |
| 146 | 7-Isopropyl-1,1,4a-<br>trimethyl-<br>1,2,3,4,4a,9,10,10a-<br>octahydrophenanthrene          | 270 | C20H30       | Terpenoid  |
| 147 | Manool                                                                                      | 290 | C20H34O      | Terpenoid  |
| 148 | 9-Ethyl-10-<br>methylanthracene                                                             | 220 | C17H16       | PAH        |
| 149 | Eicosane                                                                                    | 282 | C20H42       | Alkane     |
| 150 | Henicosane                                                                                  | 296 | C21H44       | Alkane     |
| 151 | Heneicosene                                                                                 | 294 | C21H42       | Alkene     |
| 152 | 1-Octadecanol                                                                               | 270 | C21H46OSi    | Alcohol    |
| 153 | Heptadecanoic acid                                                                          | 270 | C20H42O2Si   | Acid       |
| 154 | Linoleic acid                                                                               | 280 | C21H40O2Si   | Acid       |
| 155 | Octadecenoic acid                                                                           | 282 | C21H42O2Si   | Acid       |
| 156 | Q2-3009                                                                                     | -   | -            | Aromatic   |
| 157 | UNK-2182                                                                                    | 194 | C15H26OSi    | Terpenoid  |

|     |                                                                                                                   |     |             |              |
|-----|-------------------------------------------------------------------------------------------------------------------|-----|-------------|--------------|
| 158 | Q2-613                                                                                                            | 302 | C22H34O3Si  | Terpenoid    |
| 159 | Tricosane                                                                                                         | 324 | C23H48      | Alkane       |
| 160 | Nonadecanoic acid                                                                                                 | 298 | C22H46O2Si  | Acid         |
| 161 | 1-Eicosanol                                                                                                       | 298 | C23H50OSi   | Alcohol      |
| 162 | Epiambrettolic acid                                                                                               | 270 | C22H46O3Si2 | Oxygenated   |
| 163 | 1-Tetracosene                                                                                                     | 336 | C24H48      | Alkene       |
| 164 | Tetracosane                                                                                                       | 338 | C24H50      | Alkane       |
| 165 | (1R,4aS,7S)-7-Ethenyl-1,4a,7-trimethyl-9-oxo-2,3,4,5,6,8,10,10a-octahydrophenanthrene-1-carboxylic acid           | 316 | C23H36O3Si  | Terpenoid    |
| 166 | 1-Naphthalenecarboxylic acid, decahydro-5-(5-hydroxy-3-methylpentyl)-1,4a-dimethyl-6-methylene-, (1R,4aS,5R,8aS)- | 322 | C26H50O3Si2 | Oxygenated   |
| 167 | Docosanoic acid, methyl ester                                                                                     | 354 | C23H46O2    | Ester        |
| 168 | Heneicosanoic acid                                                                                                | 326 | C24H50O2Si  | Acid         |
| 169 | 1-Monopalmitin                                                                                                    | 330 | C25H54O4Si2 | Oxygenated   |
| 170 | Tetracosanoic acid, methyl ester                                                                                  | 382 | C25H50O2    | Ester        |
| 171 | Tricosanoic acid                                                                                                  | 354 | C26H54O2Si  | Acid         |
| 172 | Tetracosanol                                                                                                      | 354 | C27H58OSi   | Alcohol      |
| 173 | Nonacosane                                                                                                        | 408 | C29H60      | Alkane       |
| 174 | Pentacosanoic acid                                                                                                | 382 | C28H58O2Si  | Acid         |
| 175 | Stigmasta-3,5-diene                                                                                               | 396 | C29H48      | Triterpenoid |
| 176 | Nonacosan-10-ol                                                                                                   | 424 | C32H68OSi   | Alcohol      |
| 177 | Hentriacontane                                                                                                    | 436 | C31H64      | Alkane       |
| 178 | Matairesinol, (3R-E)-,                                                                                            | 358 | C26H38O6Si2 | Aromatic     |
| 179 | Beta-sitosterol                                                                                                   | 414 | C32H58OSi   | Triterpenoid |
| 180 | Stigmasta-3,5-dien-7-one                                                                                          | 410 | C29H46O     | Triterpenoid |
| 181 | Gamma-Sitostenone                                                                                                 | 412 | C29H48O     | Triterpenoid |
| 182 | Octacosanoic acid                                                                                                 | 424 | C31H64O2Si  | Acid         |
| 183 | Campesterol                                                                                                       | 400 | C31H56OSi   | Triterpenoid |
| 184 | Stigmastanol                                                                                                      | 416 | C32H60OSi   | Triterpenoid |
| 185 | UNK-AHG-LY-AMZ-140                                                                                                | -   | -           | Oxygenated   |
| 186 | Q24-198                                                                                                           | 227 | C14H25O4SiN | Nitrogen     |
| 187 | Benzene, 1,3-dimethoxy-5-[(1E)-2-phenylethenyl]-                                                                  | 240 | C16H16O2    | Aromatic     |
| 188 | 3-Hydroxy-4-methyl-6H-benzo[c]chromen-6-one                                                                       | 226 | C17H18O3Si  | Aromatic     |
| 189 | Naphthalene, 1,2,3,4-tetrahydro-6-(1-phenylethyl)-                                                                | 236 | C18H20      | Aromatic     |
| 190 | Isopimaric acid, methyl ester                                                                                     | 316 | C21H32O2    | Terpenoid    |

|     |                             |     |              |            |
|-----|-----------------------------|-----|--------------|------------|
| 191 | Acetosyringone              | 196 | C13H20O4Si   | Aromatic   |
| 192 | Pyroglutamic acid           | 129 | C11H23O3Si2N | Nitrogen   |
| 193 | Acenaphthene                | 154 | C12H10       | PAH        |
| 194 | Bornyl acetate              | 196 | C12H20O2     | Terpenoid  |
| 195 | 16-Hydroxyhexadecanoic acid | 272 | C22H48O3Si2  | Oxygenated |
| 196 | Q2-551                      | -   | -            | Sugar      |
| 197 | UNK-3858                    | 132 | C12H28O3Si2  | Oxygenated |
| 198 | Undecanedioic acid          | 304 | C17H36O4Si2  | Oxygenated |

1. "UNK-" compounds are species observed but unidentified in the Fire Lab 2016 study<sup>8</sup>.
2. "UNK-AHG-LY-AMZ-" compounds are species observed but unidentified in the GoAmazon study<sup>9</sup>.
3. "UNK-AHG-HZ-SOAZ-" compounds are species observed but unidentified in the SOAS study<sup>10</sup>.
4. "Qa-b" compounds are species observed but unidentified in this study<sup>11</sup> a is the filter number, and b is the compound ID in that filter sample.

**Table S3.** Composition classes and values of  $n^0_C$  and b values used from Li et al.

| Classes | $n^0_C$ | $b_C$  | $b_O$  | $b_{CO}$ | $b_N$  | $b_S$  |
|---------|---------|--------|--------|----------|--------|--------|
| CH      | 23.80   | 0.4861 |        |          |        |        |
| CHO     | 22.66   | 0.4481 | 1.656  | -0.7790  |        |        |
| CHN     | 24.59   | 0.4066 |        |          | 0.9619 |        |
| CHON    | 24.13   | 0.3667 | 0.7732 | -0.07790 | 1.114  |        |
| CHOS    | 24.06   | 0.3637 | 1.327  | -0.3988  |        | 0.7579 |
| CHONS   | 28.50   | 0.3848 | 1.011  | 0.2921   | 1.053  | 1.316  |

**Table S4.** Coefficients for the multivariate regression with NOCs transformed to square root values. The form of the equations is  $x \text{ BrC Abs}_{405} = a + b.PAH + c.aromatic + d.(NOC^{0.5})$ 

| x   | a    | b   | c   | d     | Adjusted R <sup>2</sup> |
|-----|------|-----|-----|-------|-------------------------|
| MeS | 56.2 | 6.7 | 8.6 | 290.4 | 0.86                    |
| WS  | 27.7 | 5.1 | 4.0 | 167.5 | 0.92                    |

## References

1. P. Panteliadis, T. Hafkenscheid, B. Cary, E. Diapouli, A. Fischer, O. Favez, P. Quincey, M. Viana, R. Hitznerberger and R. Vecchi, ECOC comparison exercise with identical thermal protocols after temperature offset correction: instrument diagnostics by in-depth evaluation of operational parameters, 2015.
2. N. M. Donahue, A. Robinson, C. Stanier and S. Pandis, Coupled partitioning, dilution, and chemical aging of semivolatile organics, *Environmental science & technology*, 2006, **40**, 2635-2643.
3. A. Grieshop, J. Logue, N. Donahue and A. Robinson, Laboratory investigation of photochemical oxidation of organic aerosol from wood fires 1: measurement and simulation of organic aerosol evolution, *Atmospheric Chemistry and Physics*, 2009, **9**, 1263-1277.
4. N. M. Donahue, J. Kroll, S. N. Pandis and A. L. Robinson, A two-dimensional volatility basis set—Part 2: Diagnostics of organic-aerosol evolution, *Atmospheric Chemistry and Physics*, 2012, **12**, 615-634.
5. J. Ma, X. Li, P. Gu, T. R. Dallmann, A. A. Presto and N. M. Donahue, Estimating ambient particulate organic carbon concentrations and partitioning using thermal optical measurements and the volatility basis set, *Aerosol Science and Technology*, 2016, **50**, 638-651.
6. Y. Li, U. Pöschl and M. Shiraiwa, Molecular corridors and parameterizations of volatility in the chemical evolution of organic aerosols, *Atmospheric Chemistry and Physics*, 2016, **16**, 3327-3344.
7. S. W. Carden, N. S. Holtzman and M. J. Strube, CAHOST: An excel workbook for facilitating the Johnson-Neyman technique for two-way interactions in multiple regression, *Frontiers in psychology*, 2017, **8**, 1293.
8. C. N. Jen, L. E. Hatch, V. Selimovic, R. J. Yokelson, R. Weber, A. E. Fernandez, N. M. Kreisberg, K. C. Barsanti and A. H. Goldstein, Speciated and total emission factors of particulate organics from burning western US wildland fuels and their dependence on combustion efficiency, *Atmospheric Chemistry and Physics*, 2019, **19**, 1013-1026.
9. L. D. Yee, G. Isaacman-VanWertz, R. A. Wernis, M. Meng, V. Rivera, N. M. Kreisberg, S. V. Hering, M. S. Bering, M. Glasius and M. A. Upshur, Observations of sesquiterpenes and their oxidation products in central Amazonia during the wet and dry seasons, *Atmospheric chemistry and physics*, 2018, **18**, 10433-10457.
10. H. Zhang, L. D. Yee, B. H. Lee, M. P. Curtis, D. R. Worton, G. Isaacman-VanWertz, J. H. Offenberg, M. Lewandowski, T. E. Kleindienst and M. R. Beaver, Monoterpenes are the largest source of summertime organic aerosol in the southeastern United States, *Proceedings of the National Academy of Sciences*, 2018, **115**, 2038-2043.
11. Y. Liang, C. Stamatis, E. C. Fortner, R. A. Wernis, P. Van Rooy, F. Majluf, T. I. Yacovitch, C. Daube, S. C. Herndon and N. M. Kreisberg, Emissions of organic compounds from western US wildfires and their near-fire transformations, *Atmospheric Chemistry and Physics*, 2022, **22**, 9877-9893.
